# Supplementary material for: Dispersible MoS2 micro-sheets induced a proinflammatory response and apoptosis in the gills and liver of adult zebrafish
Source: Royal Society of Chemistry journal article supplement (doi:10.1039/c8ra00922h), 2018-01-01
Supplement: c8ra00922h1.pdf [file c8ra00922h1.pdf]

Manuscript Number: **RA-ART-01-2018-000922.R1**

## **Supporting Information**

### **Dispersible MoS<sub>2</sub> micro-sheets Induced Proinflammatory Response and Apoptosis in the Gill and Liver of Adult Zebrafish**

Yadong Yu<sup>1,#,\*</sup>, Yanliang Yi<sup>2,#</sup>, Yangying Li<sup>2</sup>, Ting Peng<sup>2</sup>, Shanli Lao<sup>2</sup>, Jiahao Zhang<sup>2</sup>,  
Shaocui Liang<sup>1</sup>, Yan Xiong<sup>1</sup>, Shasha Shao<sup>1</sup>, Na Wu<sup>1</sup>, Ye Zhao<sup>2</sup>, He Huang<sup>2,3</sup>

<sup>1</sup> College of Biotechnology and Pharmaceutical Engineering, Nanjing Tech University, Nanjing,  
211800, China

<sup>2</sup> School of Pharmaceutical Sciences, Nanjing Tech University, Nanjing, 211800, China

<sup>3</sup> State Key Laboratory of Materials-Oriented Chemical Engineering, Nanjing Tech University,  
Nanjing, 211800, China

# These authors contributed equally to this work.

\* Corresponding authors:

Yadong Yu, Ph.D

Assistant Professor

College of Biotechnology and Pharmaceutical Engineering, Nanjing Tech University

No.30 Puzhu South Road, Nanjing, 211800, China

Tel: (86) 25-58139942

Email: yadongyu@njtech.edu.cn

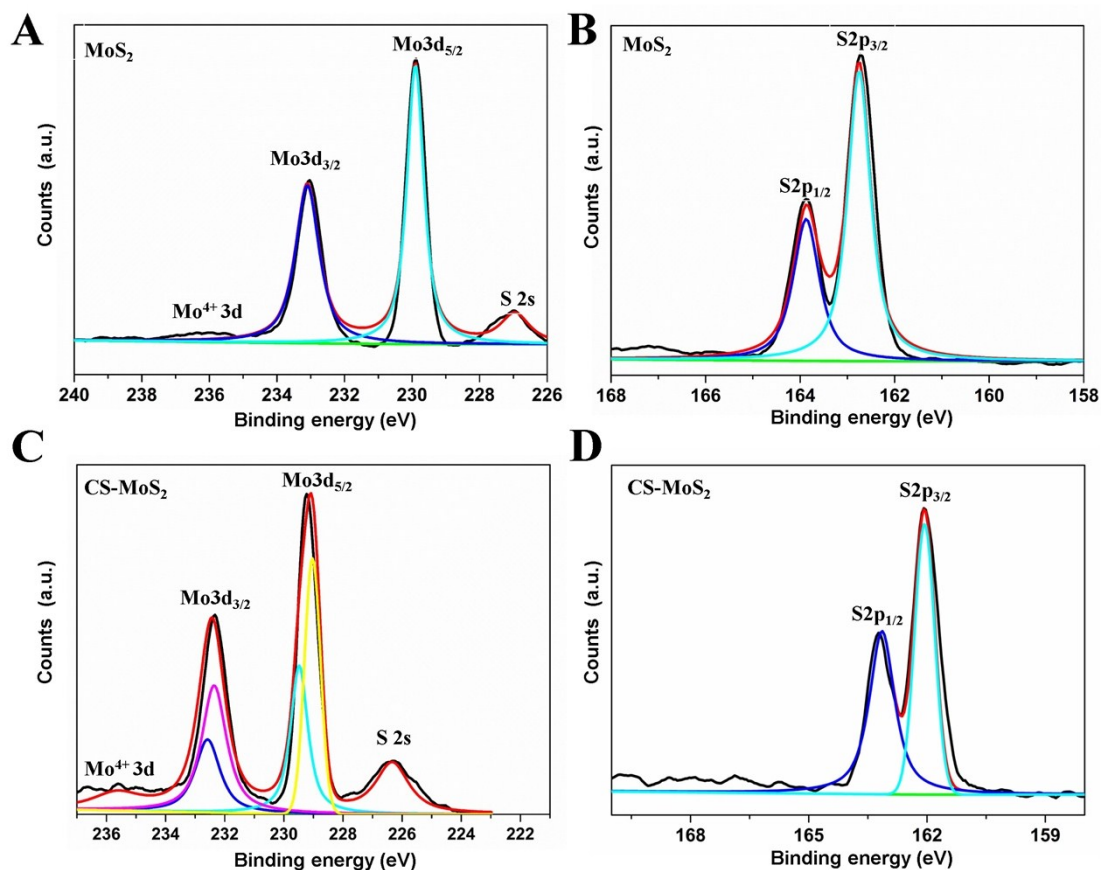

Fig. S1 (A-B) XPS spectra of native MoS<sub>2</sub> (Mo 3d and S 2p); (C-D) XPS spectra of CS-MoS<sub>2</sub> micro-sheets (Mo 3d and S 2p). (Adapted with permission from (Yadong Yu, et al., Dispersible MoS<sub>2</sub> Nanosheets Activated TGF- $\beta$ /Smad Pathway and Perturbed the Metabolome of Human Dermal Fibroblasts, *ACS Biomater. Sci. Eng.*, 2017, 3 (12): 3261–3272). Copyright (2017) American Chemical Society.)

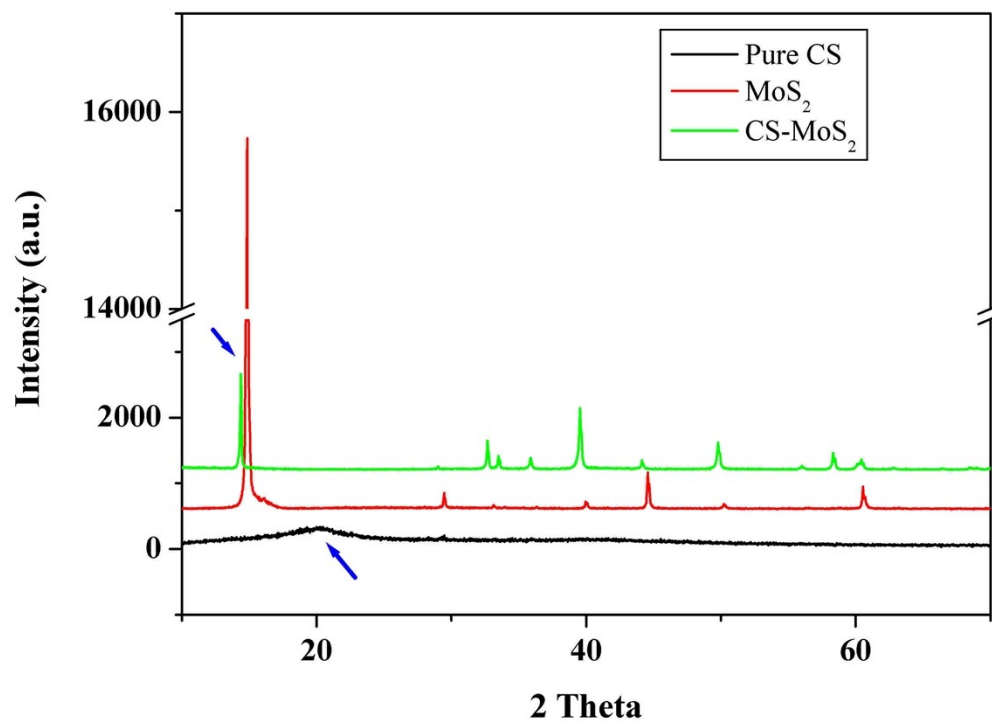

Fig. S2 XRD patterns of Chitosan (CS), MoS<sub>2</sub> and CS-MoS<sub>2</sub> micro-sheets.
